# Supplementary material for: The Importance of Implementation Strategy in Scaling Up Xpert MTB/RIF for Diagnosis of Tuberculosis in the Indian Health-Care System: A Transmission Model
Source: PubMed Central journal article supplement (PMC4098913; doi:10.1371/journal.pmed.1001674), 2014-07-15

Figure S2. Partial rank correlation coefficients

**A. MDR incidence in scenario 1**

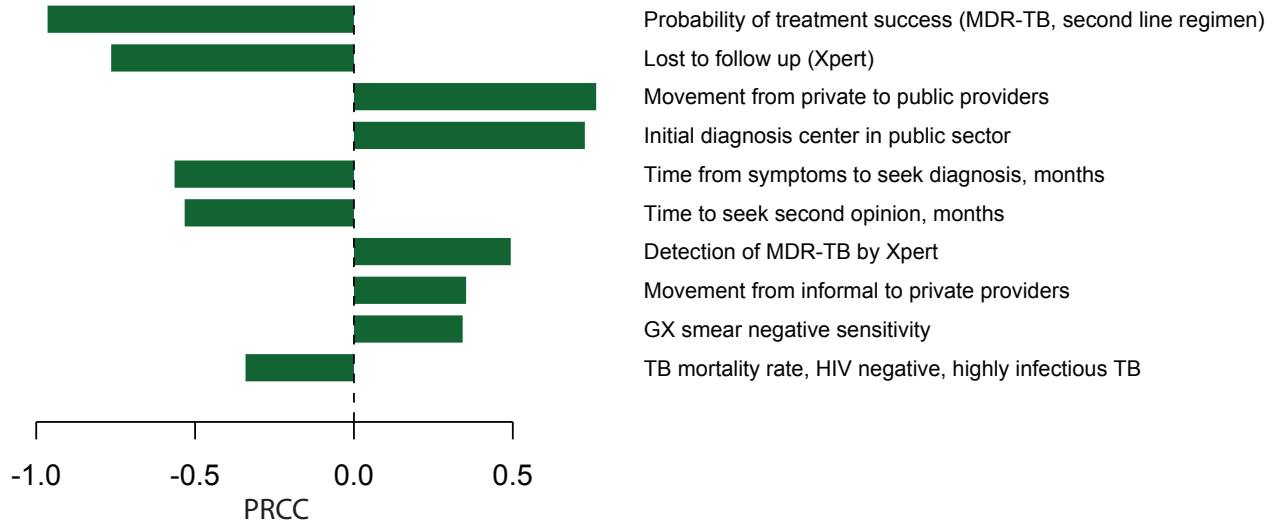

**B. Total incidence in scenario 2**

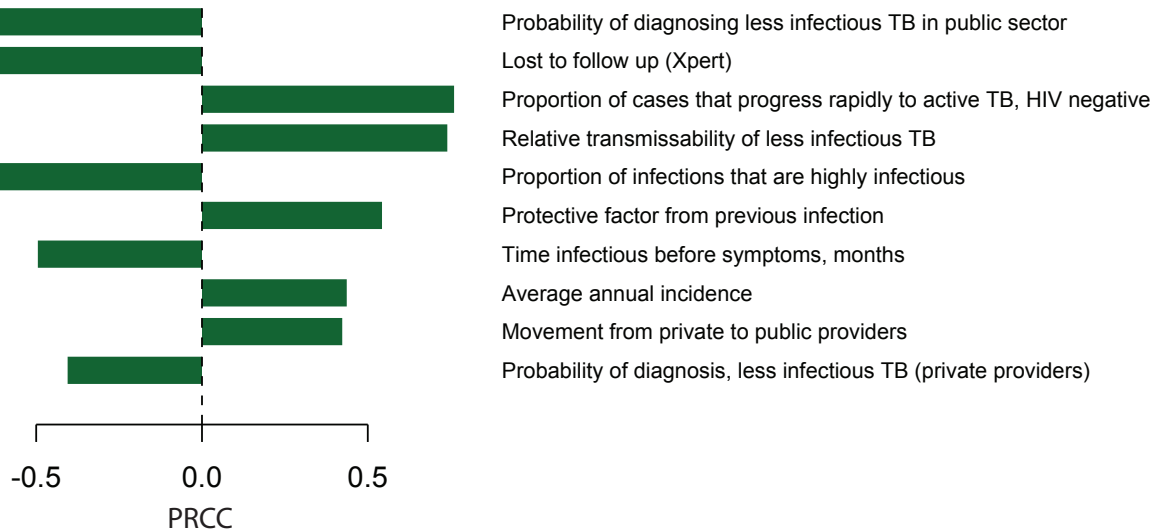

Supplement: pmed.1001674.s002.pdf [file pmed.1001674.s002.pdf]
