# Supplementary material for: The Importance of Implementation Strategy in Scaling Up Xpert MTB/RIF for Diagnosis of Tuberculosis in the Indian Health-Care System: A Transmission Model
Source: PubMed Central journal article supplement (PMC4098913; doi:10.1371/journal.pmed.1001674), 2014-07-15
Supplement: pmed.1001674.s003.pdf [file pmed.1001674.s003.pdf]

**Table S1. Model compartments**

| <b>Compartment</b> | <b>Description</b>                                                                                                                                                                      | <b>Separated by</b>                                                                                                                                                  |
|--------------------|-----------------------------------------------------------------------------------------------------------------------------------------------------------------------------------------|----------------------------------------------------------------------------------------------------------------------------------------------------------------------|
| <b>U</b>           | <b>Uninfected individuals.</b> Those never infected.                                                                                                                                    | -HIV(+/-)                                                                                                                                                            |
| <b>L</b>           | <b>Latently infected.</b> Infected individuals that progress slowly to active disease.                                                                                                  | -HIV(+/-)<br>-MDR(+/-)                                                                                                                                               |
| <b>I</b>           | <b>Pre-symptomatic Infectious.</b> Infectious individuals that do not yet have symptoms.                                                                                                | -HIV(+/-)<br>-MDR(+/-)<br>-Smear(+/-)<br>-Treatment History (Never treated, Treated previously)                                                                      |
| <b>A</b>           | <b>Symptomatic active disease.</b> Symptomatic individuals with active disease who have not yet started seeking healthcare.                                                             | -HIV(+/-)<br>-MDR(+/-)<br>-Smear(+/-)<br>-Treatment History (Never treated, Treated previously)                                                                      |
| <b>D</b>           | <b>Diagnosis seeking.</b> Those that have visited healthcare providers for diagnosis but have not been successfully diagnosed.                                                          | -HIV(+/-)<br>-MDR(+/-)<br>-Smear(+/-)<br>-Treatment History (Never treated, Treated previously)<br>-HCP(informal/qualified/public)                                   |
| <b>Z</b>           | <b>Successfully diagnosed.</b> Those that have visited healthcare providers for diagnosis and have been successfully diagnosed and are awaiting treatment initiation.                   | -HIV(+/-)<br>-MDR(+/-)<br>-Smear(+/-)<br>-Treatment History (Never treated, Treated previously)<br>-HCP(informal/qualified/public)                                   |
| <b>T</b>           | <b>On treatment.</b> Those that are on treatment - either on first line (first time on treatment), retreatment (subsequent infections) or second line (after successful MDR diagnosis). | -HIV(+/-)<br>-MDR(+/-)<br>-Treatment History (Never treated, Treated previously)<br>-Treatment Regimen(first line/retreat/second line)<br>-Success (cured/not cured) |
| <b>R</b>           | <b>Recovered.</b> Those that have been cured by treatment or spontaneously recover. Susceptible to endogenous reactivation or new infection.                                            | -HIV(+/-)<br>-MDR(+/-)                                                                                                                                               |

HCP: Healthcare Provider
